# Supplementary material
Source: publisher site journal article supplement (https://www.dovepress.com/article/474275)
Supplement: Supplementary file 1 [file get_supplementary_file.php]

**Appendix 1.**

**Modiﬁed Observer’s Assessment of Alertness/Sedation (MOAA/S) Responsiveness Score**

| **Responsiveness** | **Score** |
| --- | --- |
| Responds readily to name spoken in normal tone | 5 |
| Lethargic response to name spoken in normal tone | 4 |
| Responds only after name is called loudly and/or repeatedly | 3 |
| Responds only after mild prodding or shaking | 2 |
| Responds only after painful trapezius squeeze | 1 |
| Does not respond to painful trapezius squeeze | 0 |

**Note:** Reuse with permission from Chernik DA, Gillings D, Laine H, et al. Validity and Reliability of the Observer's: Assessment of Alertness/Sedation Scale: Study with: Intravenous Midazolam. *J Clin Psychopharmacol*. 1990;10(4):244-251. Available from: https://journals.lww.com/psychopharmacology/abstract/1990/08000/validity_and_reliability_of_the_observer_s_.3.aspx.18

**Appendix 2.**

The modified post-anesthetic discharge scoring system

| Categories | Points |
| --- | --- |
| Vital signs |  |
| BP and HR ± 20% of pre-endoscopy value | 2 |
| BP and HR ± 20%-40% of pre-endoscopy value | 1 |
| BP and HR ± 40% of pre-endoscopy value | 0 |
| Activity |  |
| Steady gait, no dizziness or meets pre-endoscopy level | 2 |
| Requires assistance | 1 |
| Unable to ambulate | 0 |
| Nausea and vomiting |  |
| No or minimal/treated with p.o. medication | 2 |
| Moderate/treated with parenteral medication | 1 |
| Severe/continues despite treatment | 0 |
| Pain |  |
| Minimal or no pain (Numerical Analogue Scale = 0-3) | 2 |
| Moderate (Numerical Analogue Scale = 4-6) | 1 |
| Severe (Numerical Analogue Scale = 7-10) | 0 |
| Surgical bleeding |  |
| None or Minimal (not requiring intervention) | 2 |
| Moderate (1 episode of hematemesis or rectal bleeding) | 1 |
| Severe (≥ 2 episodes of hematemesis or rectal bleeding) | 0 |

Discharge standards are satisfied if the score is ≥ 9.

BP: blood pressure, HR: heart rate, p.o.: orally
